# Supplementary material
Source: Royal Society of Chemistry journal article supplement (doi:10.1039/d6dt00531d)
Supplement: d6dt00531d1.pdf [file d6dt00531d1.pdf]

## Supporting Information

### High-sensitivity temperature sensing in $\text{MgGa}_2\text{O}_4:\text{Bi}^{3+}$ phosphors via thermal-assisted energy transfer

Xiangxin Kong<sup>a</sup>, Guofu Wei<sup>a</sup>, Jian Ma<sup>a</sup>, Peng Liu<sup>\*a</sup>, Yan Xu<sup>\*b</sup>, Mingdong Zhou<sup>\*a</sup>

<sup>a</sup>College of Chemical Engineering, Shenyang University of Chemical Technology, Shenyang, Liaoning 110819, China

<sup>b</sup>Department of Chemistry, College of Science, Northeastern University, Shenyang, Liaoning 110819, China

#### Figure Captions:

**Fig. S1** SEM spectra of  $\text{MgGa}_2\text{O}_4$ : x%  $\text{Bi}^{3+}$  sample.

**Fig. S2** Rietveld XRD refinements of the prepared  $\text{MgGa}_2\text{O}_4$ :1.5% $\text{Bi}^{3+}$  phosphors.

**Fig. S3.** XPS spectra of  $\text{MgGa}_2\text{O}_4$ : 1.5%  $\text{Bi}^{3+}$  material.

**Fig.S4:** PLE and PL spectra of  $\text{MgGa}_2\text{O}_4$ : 0%  $\text{Bi}^{3+}$  sample,  $\lambda_{\text{em}} = 408, 502\text{nm}$  and  $\lambda_{\text{ex}} = 250\text{nm}$ ;

**Fig.S5:** PLE spectra of  $\text{MgGa}_2\text{O}_4$ :  $\text{Bi}^{3+}$ (0% ,1.5%) sample,  $\lambda_{\text{em}} = 502\text{nm}$ ;

**Fig. S6** Multipeak fitting of TL curves for  $\text{MgGa}_2\text{O}_4$ : x% Bi materials with x equals to 0.75%, 1.5%, 3% and 5%  $\text{Bi}^{3+}$ , respectively.

**Table S1** Rietveld refined crystallographic data for  $\text{MgGa}_2\text{O}_4$ : 1.5% Bi

**Table S2** Atomic occupancy, atomic fraction coordinates, and isotropic temperature factors for  $\text{MgGa}_2\text{O}_4$ :1.5% Bi samples.

**Table S3** Thermoluminescence kinetic parameters of  $\text{MgGa}_2\text{O}_4$ :x% $\text{Bi}^{3+}$  (x = 0.75, 1.5, 3, 5) samples.

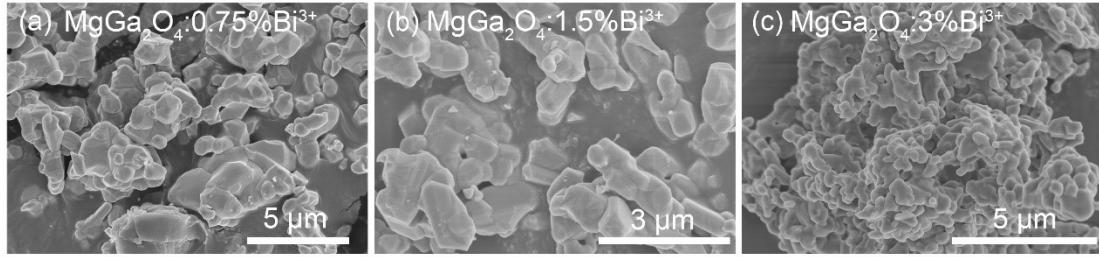

**Fig. S1** SEM spectra of  $\text{MgGa}_2\text{O}_4$ :  $x\% \text{Bi}^{3+}$  sample, (a)  $x=0.75$ , (b)  $x=1.5$ , (c)  $x=3$ .

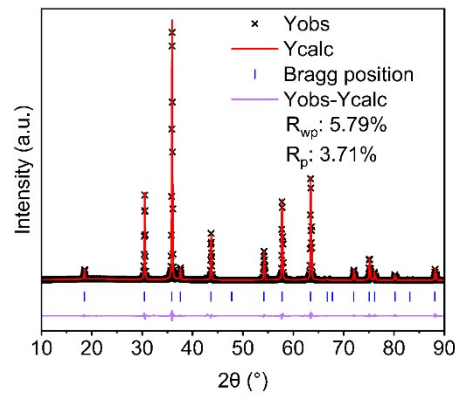

**Fig. S2.** Rietveld XRD refinements of the prepared  $\text{MgGa}_2\text{O}_4$ : $1.5\% \text{Bi}^{3+}$  phosphors.

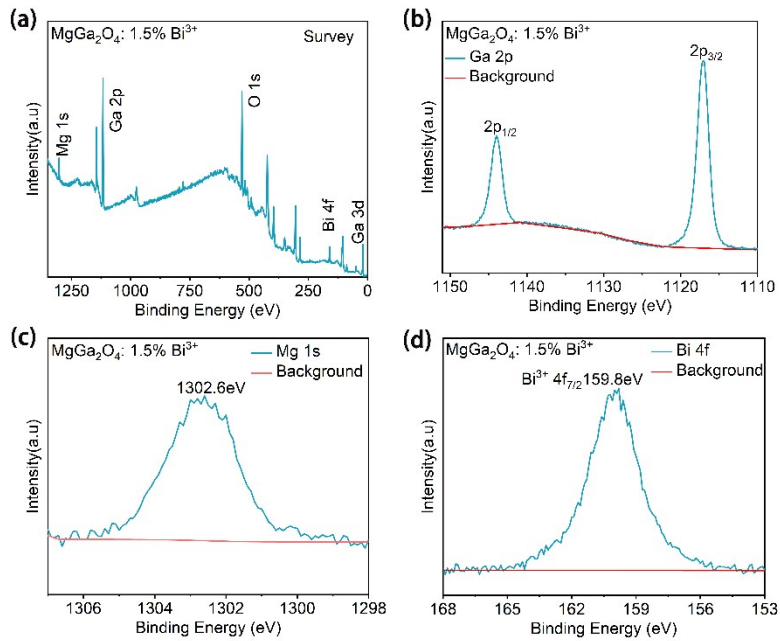

**Fig. S3** XPS spectra of  $\text{MgGa}_2\text{O}_4$ :  $1.5\% \text{Bi}^{3+}$  material: (a) Survey, (b) Ga 2p, (c) Mg 1s, and (d) Bi 4f,

respectively.

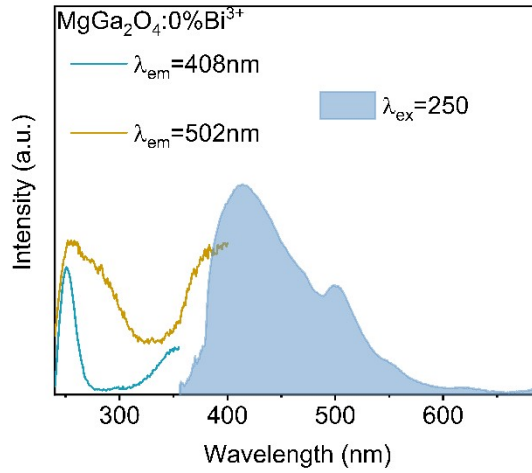

**Fig.S4:** PLE and PL spectra of  $\text{MgGa}_2\text{O}_4: 0\% \text{Bi}^{3+}$  sample,  $\lambda_{\text{em}} = 408, 502 \text{ nm}$  and  $\lambda_{\text{ex}} = 250\text{nm}$ ;

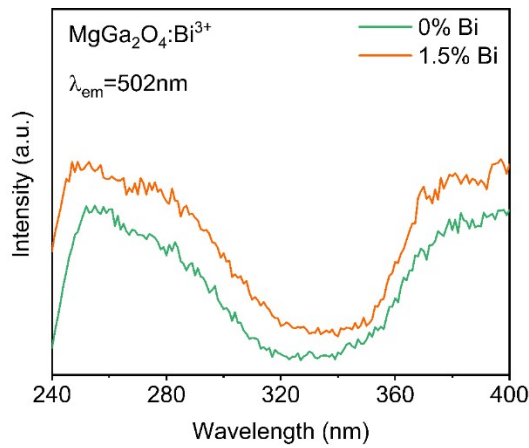

**Fig.S5:** PLE spectra of  $\text{MgGa}_2\text{O}_4: \text{Bi}^{3+}(0\%, 1.5\%)$  sample,  $\lambda_{\text{em}} = 502\text{nm}$ ;

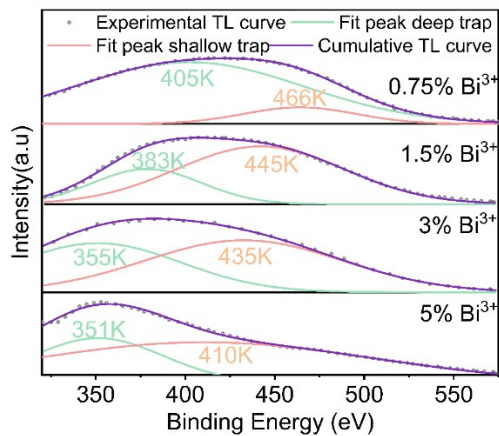

**Fig. S6** Multiplex fitting of TL curves for  $\text{MgGa}_2\text{O}_4: x\% \text{Bi}$  materials with  $x$  equals to 0.75%, 1.5%, 3% and 5%  $\text{Bi}^{3+}$ , respectively.

**Table S1** Rietveld refined crystallographic data for MgGa<sub>2</sub>O<sub>4</sub>: 1.5% Bi

| Parameters                                | Values      |
|-------------------------------------------|-------------|
| Crystal system                            | Cubic       |
| Space group                               | Fd-3m (227) |
| a (Å) = b (Å) = c (Å)                     | 8.29159(9)  |
| $\alpha$ (°) = $\beta$ (°) = $\gamma$ (°) | 90          |
| Volume (Å <sup>3</sup> )                  | 570.05      |
| Z                                         | 8           |
| R <sub>p</sub>                            | 3.71%       |
| R <sub>wp</sub>                           | 5.79%       |
| Rc                                        | 1.55%       |
| X <sup>2</sup>                            | 3.54        |

**Table S2** Atomic occupancy, atomic fraction coordinates, and isotropic temperature factors for MgGa<sub>2</sub>O<sub>4</sub>:1.5% Bi samples.

| <b>Atom</b> | <b>Wyck.</b> | <b>s.o.f.</b> | <b>x</b> | <b>y</b> | <b>z</b> | <b>B/ 10<sup>4</sup> pm<sup>2</sup></b> |
|-------------|--------------|---------------|----------|----------|----------|-----------------------------------------|
| O1          | 32e          | 1.000000      | 0.243249 | 0.243249 | 0.243249 | 0.515000                                |
| MG1         | 16c          | 0.492449      | 0.000000 | 0.000000 | 0.000000 | 0.352000                                |
| GA1         | 16c          | 0.488024      | 0.000000 | 0.000000 | 0.000000 | 0.352000                                |
| GA2         | 8b           | 0.796505      | 0.375000 | 0.375000 | 0.375000 | 0.317000                                |
| MG2         | 8b           | 0.200000      | 0.375000 | 0.375000 | 0.375000 | 0.317000                                |
| Bi1         | 16c          | 0.019527      | 0.000000 | 0.000000 | 0.000000 | 0.352000                                |

| Atom | Wyck. | s.o.f.   | x        | y        | z        | B/ 10 <sup>4</sup> pm <sup>2</sup> |
|------|-------|----------|----------|----------|----------|------------------------------------|
| Bi2  | 8b    | 0.009750 | 0.375000 | 0.375000 | 0.375000 | 0.317000                           |

**Table S3** Thermoluminescence kinetic parameters of MgGa<sub>2</sub>O<sub>4</sub>:x%Bi<sup>3+</sup> (x = 0.75, 1.5, 3, 5) samples.

| Sample                                                  | Deconvoluted TL peaks | Max. tem. peak (Tm) | Activation energy (eV) |
|---------------------------------------------------------|-----------------------|---------------------|------------------------|
| MgGa <sub>2</sub> O <sub>4</sub> :0.75%Bi <sup>3+</sup> | Peak1                 | 405K                | 0.810                  |
|                                                         | Peak2                 | 466K                | 0.932                  |
| MgGa <sub>2</sub> O <sub>4</sub> :1.5%Bi <sup>3+</sup>  | Peak1                 | 383K                | 0.766                  |
|                                                         | Peak2                 | 445K                | 0.890                  |
| MgGa <sub>2</sub> O <sub>4</sub> :3%Bi <sup>3+</sup>    | Peak1                 | 355K                | 0.710                  |
|                                                         | Peak2                 | 435K                | 0.870                  |
| MgGa <sub>2</sub> O <sub>4</sub> :5%Bi <sup>3+</sup>    | Peak1                 | 351K                | 0.702                  |
|                                                         | Peak2                 | 410K                | 0.820                  |
